# Supplementary material for: Effects of Host Plants on Bacterial Community Structure in Larvae Midgut of Spodoptera frugiperda
Source: MDPI journal article supplement (doi:10.3390/insects13040373), 2022-04-11
Supplement: s1 [file s1]

**Table S1 Statistics of the OTU numbers of bacteria in the gut of the 5th instar larvae of *S. frugiperda***

| sample | raw_reads_R | clean_reads | Total_tag | Taxon_Tag | Unique_Tag | OTU_num |
|--------|-------------|-------------|-----------|-----------|------------|---------|
| SF-W1  | 79047       | 73373       | 66857     | 65567     | 1225       | 953     |
| SF-W2  | 81579       | 75628       | 68142     | 67213     | 886        | 1048    |
| SF-W3  | 79432       | 73055       | 65984     | 64682     | 1088       | 1092    |
| SF-W4  | 78928       | 47864       | 40351     | 39492     | 843        | 2597    |
| SF-W5  | 79578       | 73937       | 68059     | 67119     | 791        | 990     |
| SF-W6  | 81913       | 76374       | 69638     | 68209     | 1219       | 1086    |
| SF-W7  | 77380       | 71420       | 64855     | 64213     | 556        | 1130    |
| SF-W8  | 81129       | 73168       | 65487     | 64299     | 1161       | 1698    |
| SF-M1  | 78160       | 72903       | 67453     | 66556     | 805        | 1334    |
| SF-M2  | 79710       | 71998       | 63550     | 62231     | 1142       | 1277    |
| SF-M3  | 81069       | 73379       | 65547     | 64445     | 1082       | 1260    |
| SF-M4  | 81586       | 74696       | 68952     | 68231     | 684        | 1125    |
| SF-M5  | 80315       | 70744       | 68832     | 68129     | 674        | 1259    |
| SF-M6  | 80512       | 72968       | 66759     | 65911     | 761        | 1207    |
| SF-M7  | 81605       | 75338       | 66039     | 65314     | 573        | 1230    |
| SF-M8  | 80707       | 72416       | 60602     | 59438     | 922        | 1816    |
| SF-P1  | 81518       | 75452       | 64643     | 63617     | 980        | 1544    |
| SF-P2  | 78307       | 71681       | 64100     | 63252     | 716        | 1429    |
| SF-P3  | 81312       | 74694       | 65633     | 64648     | 907        | 1687    |
| SF-P4  | 80861       | 74365       | 67497     | 66823     | 652        | 1661    |
| SF-P5  | 81132       | 74837       | 60219     | 59218     | 961        | 1438    |
| SF-P6  | 81068       | 74770       | 63372     | 62477     | 819        | 1846    |
| SF-P7  | 78824       | 74035       | 64373     | 63545     | 808        | 2437    |
| SF-P8  | 78017       | 70876       | 60352     | 58904     | 1409       | 2942    |
| SF-T1  | 79657       | 74539       | 66430     | 65653     | 774        | 1453    |
| SF-T2  | 78693       | 72322       | 62616     | 61491     | 1104       | 1951    |
| SF-T3  | 81229       | 73602       | 68721     | 68003     | 637        | 1141    |
| SF-T4  | 78224       | 73758       | 65576     | 64242     | 1334       | 1194    |
| SF-T5  | 81893       | 76197       | 67855     | 66827     | 922        | 1377    |
| SF-T6  | 79791       | 74222       | 69002     | 68168     | 789        | 1237    |
| SF-T7  | 79776       | 73148       | 68237     | 67873     | 363        | 1013    |
| SF-T8  | 78159       | 70699       | 61073     | 59949     | 1066       | 2116    |

The numbers 1-8 following the sample names represent different replicates, respectively.

**Table S2 Biomarkers of bacteria in the gut of the 5th instar larvae of *S. frugiperda***

| Group | Phylum         | Class                | Order               | Family               | Genus                    |
|-------|----------------|----------------------|---------------------|----------------------|--------------------------|
| SF-T  | Finnicutes     |                      |                     |                      | ZOR0006*                 |
|       | Firmicutes     | Mollicutes           | Mycoplasmatales     | Erysipelotrichaceae* |                          |
|       | Firmicutes     | Erysipelotrichia*    |                     |                      |                          |
|       | Firmicutes     | Erysipelotrichia     | Erysipelotrichales* |                      |                          |
|       | Proteobacteria | Gammaproteobacteria  | Enterobacterales    | Enterobacteraceae    | Enterobacter*            |
|       | Proteobacteria | Proteobacteria       | Pseudomonadales     | Moraxellaceae        | Acinetobacter*           |
|       | Proteobacteria | Proteobacteria       | Pseudomonadales     | Moraxellaceae*       |                          |
|       | Proteobacteria | Proteobacteria       | Pseudomonadales*    |                      |                          |
| ST-M  | Proteobacteria | Alphaproteobacteria  | Rhizobiales*        |                      |                          |
|       | Proteobacteria | Alphaproteobacteria  | Rhizobiales         | Brucellaceae*        |                          |
|       | Actinobacteria | Actinobacteria       | Micrococcales*      |                      |                          |
| SF-P  | Finmicutes     | Bacilli              | Lactobacillales     | Enterococcaceae*     |                          |
|       | Finmicutes     | Bacilli              | Lactobacillales     | Enterococcaceae      | Enterococcus*            |
|       | Finmicutes     | Bacilli              | Lactobacillales*    |                      |                          |
|       | Finmicutes     | Bacilli*             |                     |                      |                          |
|       | Firmicutes*    |                      |                     |                      |                          |
| SF-W  | Bacteroidetes* |                      |                     |                      |                          |
|       | Bacteroidetes  | Bacteroidia*         |                     |                      |                          |
|       | Bacteroidetes  | Bacteroidia          | Bacteroidales*      |                      |                          |
|       | Firmicutes     | Clostridia           | Clostridiales*      |                      |                          |
|       | Firmicutes     | Clostridia*          |                     |                      |                          |
|       |                |                      |                     | Muribaculaceae*      |                          |
|       | Proteobacteria | Alphaproteobacteria* |                     |                      |                          |
|       | Firmicutes     | Clostridia           | Clostridiales       | Lachnospiraceae*     |                          |
|       | Bacteroidetes  | Bacteroidia          | Bacteroidales       | Prevotellaceae*      |                          |
|       | Firmicutes     | Clostridia           | Clostridiales       | Ruminococcaceae*     |                          |
|       | Actinobacteria | Actinobacteria*      |                     |                      |                          |
|       | Proteobacteria | Betaproteobacteria*  |                     |                      |                          |
|       | Bacteroidetes  | Bacteroidia          | Bacteroidales       | Bacteroidaceae*      |                          |
|       | Bacteroidetes  | Bacteroidia          | Bacteroidales       | Bacteroidaceae       | Bacteroides*             |
|       | Proteobacteria | Betaproteobacteria   | Burkholderiales*    |                      |                          |
|       | Proteobacteria | Gammaproteobacteria  | Enterobacterales    | Enterobacteraceae    | Escher'chia*             |
|       |                |                      |                     | Rikenellaceae*       |                          |
|       | Finmicutes     | Bacilli              | Lactobacillales     | Lactobacillaceae*    |                          |
|       | Finmicutes     | Bacilli              | Lactobacillales     | Lactobacillaceae     | Lactobacillus*           |
|       | Proteobacteria | Deltaproteobacteria* |                     |                      |                          |
|       | Bacteroidetes  | Sphingomonadia       | Sphingomonadales*   |                      |                          |
|       | Bacteroidetes  | Sphingomonadia       | Sphingomonadales    | Sphingomonadaceae*   |                          |
|       | Firmicutes     | Clostridia           | Clostridiales       | Lachnospiraceae      | Ruminococcaceae-UCG-014* |
|       | Firmicutes     | Clostridia           | Clostridiales       | Rikenellaceae        | Alistipes*               |

Bacteroidetes

Flavobacteriia\*

“\*” represents the dominant biomarker of bacteria in the gut of the 5th instar larvae of *S. frugiperda*

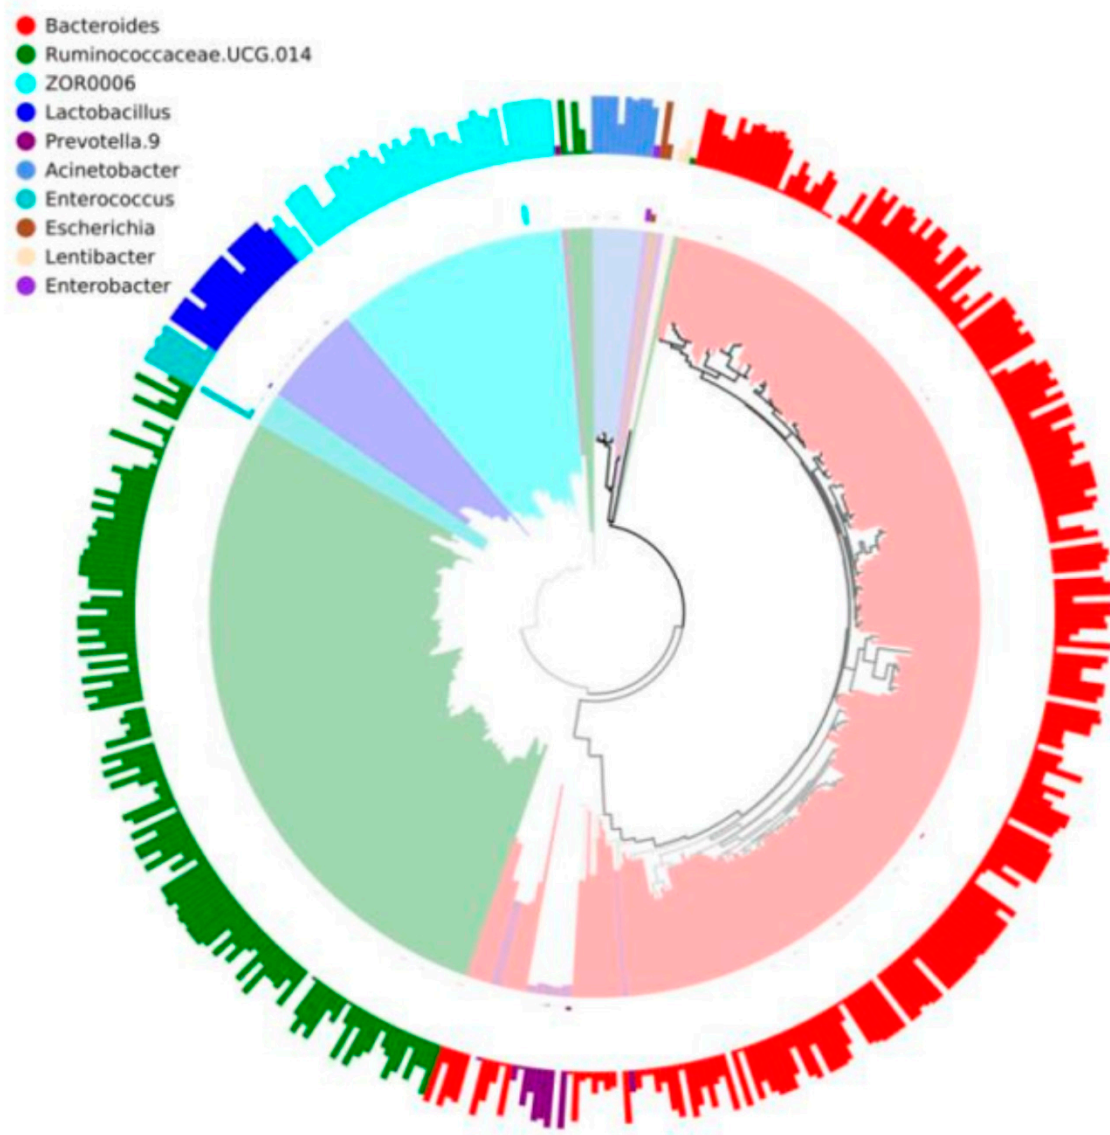

**Figure S1.** Neighbor-joining phylogenetic tree of the larval gut microbiota of *S. frugiperda*.
